# Supplementary material for: Mega-Bites: Extreme jaw forces of living and extinct piranhas (Serrasalmidae)
Source: PubMed Central journal article supplement — Sci Rep. 2012 Dec 20;2:1009. doi: 10.1038/srep01009 (PMC3526859; doi:10.1038/srep01009), 2012-12-20
Supplement: srep01009-s1.pdf [file srep01009-s1.pdf]

**Title: MEGA-BITES: Extreme jaw forces of living and extinct piranhas (Serrasalminidae)**

**Authors:** Justin R. Grubich<sup>1,2,3</sup> \*, Steve Huskey<sup>3</sup>, Stephanie Crofts<sup>4</sup>, Guillermo Orti<sup>5</sup>, and Jorge Porto<sup>6</sup>.

**Supplementary Information:**

**SI Figure 1:** Molecular phylogeny of the Serrasalminidae showing the three sub-clades: 1) carnivorous piranha clade, 2) omnivorous *Myleus* clade, 3) herbivorous pacu clade (reprinted from Orti *et al.* 2008). Red arrow indicates the relative position of *M. paranensis* and shows its close phylogenetic relatedness to *S. rhombeus* (blue arrow) as derived from the parsimony analysis of morphological characters for the fossil premaxilla and teeth by Cione *et al.* (2009).

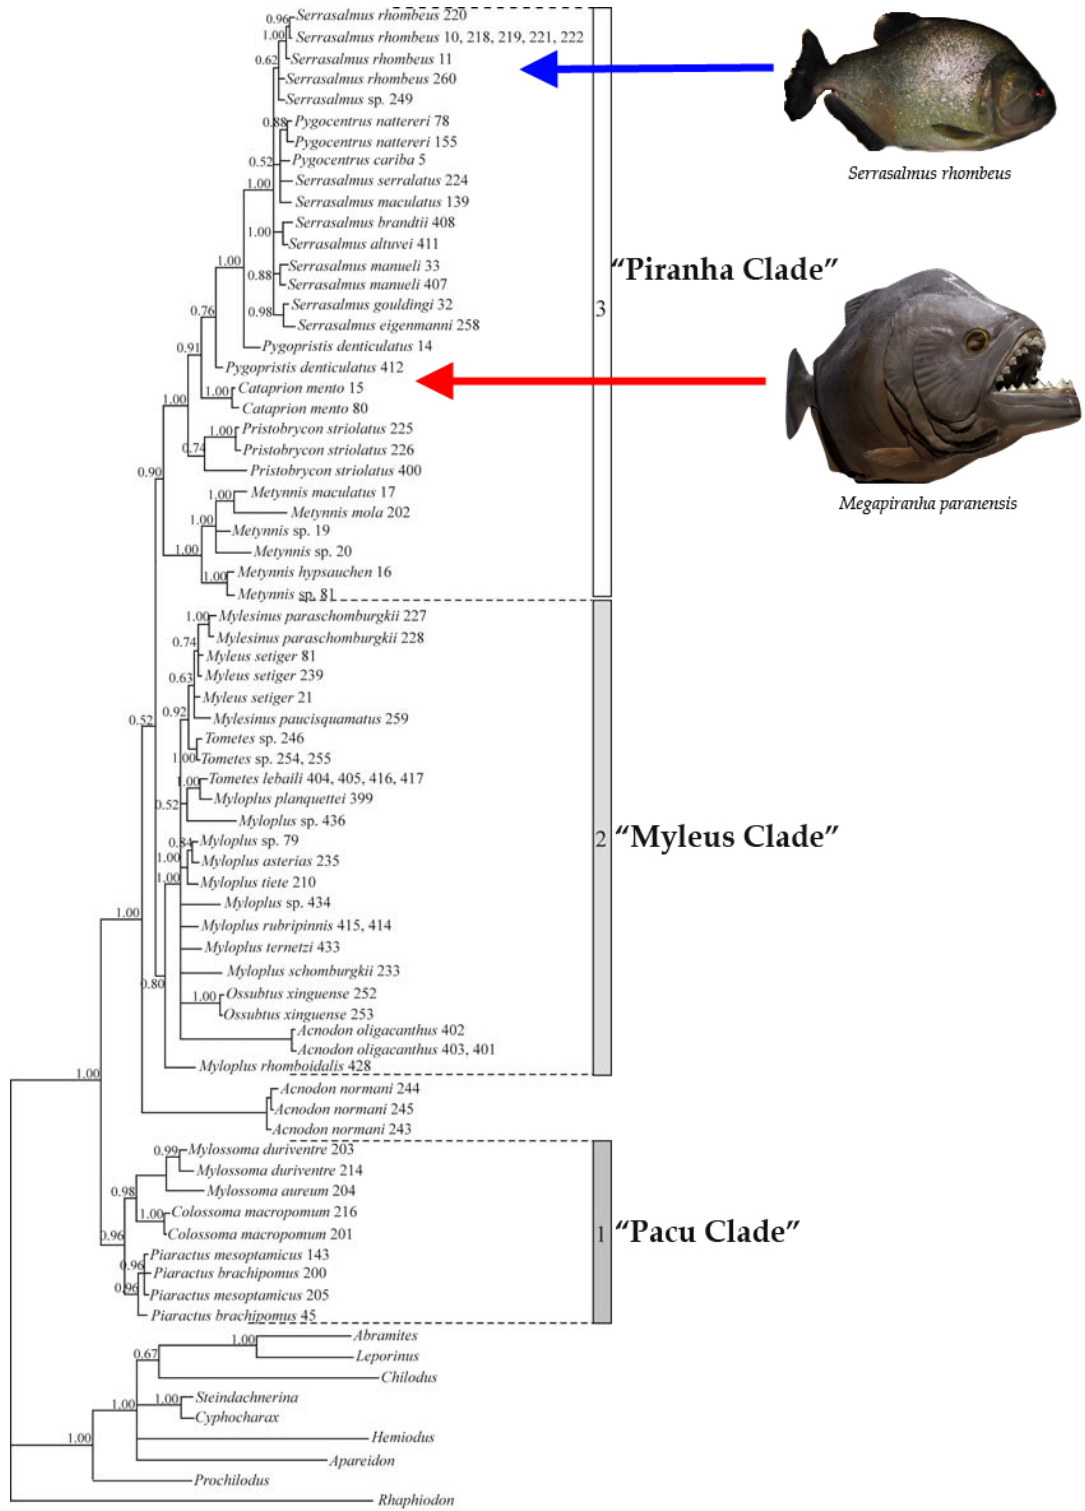

**SI Movie 1.** Megapiranha Bite Simulations: This video shows the indentation results of a metal replica of the *M. paranensis* fossil jaw and teeth while impacting the bony tissues of an armored catfish, *Hoplosternum littorale*. (<http://www.youtube.com/watch?v=5aHb0h2bvs>)

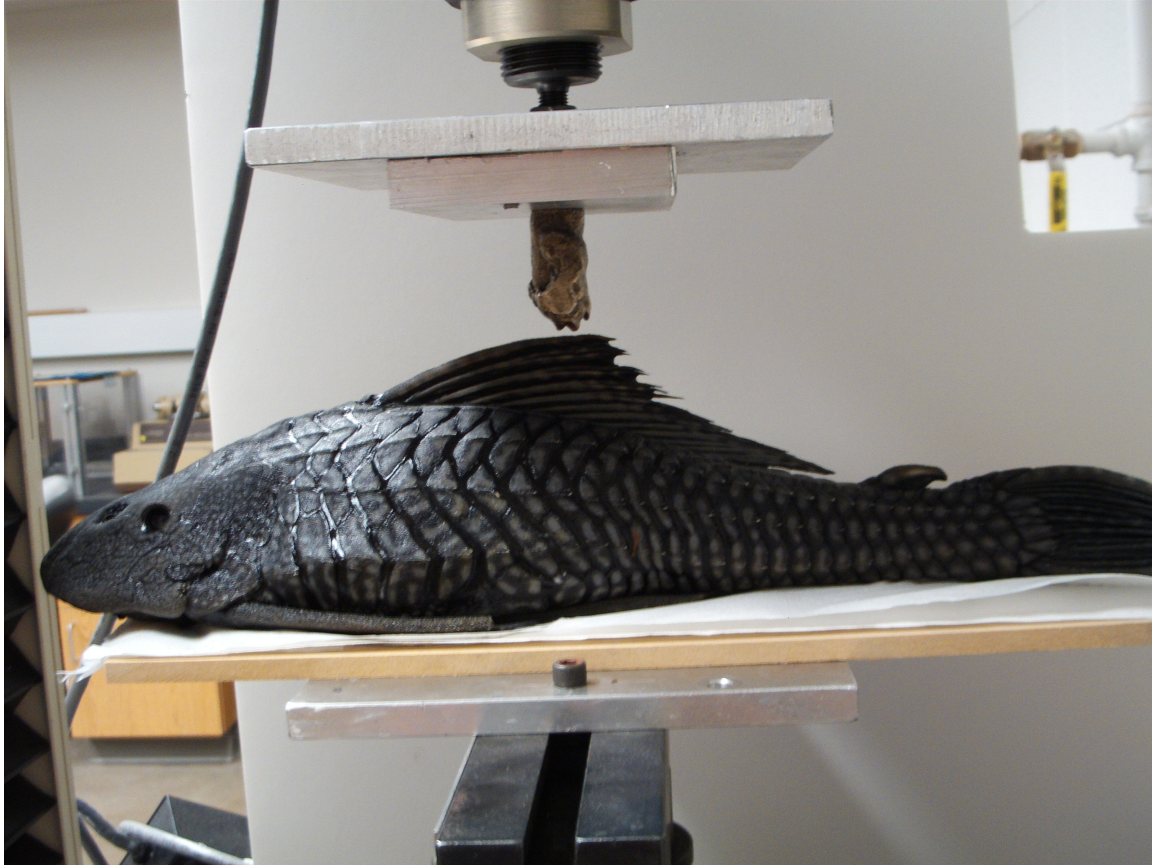

**SI Table 1. *In-vivo* bite forces of wild black piranha, *Serrasalmus rhombeus*.**

| <b>Individual</b> | <b>TL (mm)</b> | <b># of Bites</b> | <b>Peak Bite (N)</b> | <b>Mean Bite (N)</b> | <b>Std Dev Bite (N)</b> |
|-------------------|----------------|-------------------|----------------------|----------------------|-------------------------|
| 1                 | 365            | 3                 | 306.93               | 280.24               | 24.77                   |
| 2                 | 215            | 1                 | 75.62                | na                   | na                      |
| 3                 | 205            | 1                 | 66.72                | na                   | na                      |
| 4                 | 300            | 4                 | 93.41                | 74.51                | 22.21                   |
| 5                 | 250            | 1                 | 142.34               | na                   | na                      |
| 6                 | 220            | 1                 | 88.96                | na                   | na                      |
| 7                 | 368            | 2                 | 320.27               | 306.9                | 18.86                   |
| 8                 | 295            | 9                 | 235.76               | 212.53               | 20.36                   |
| 9                 | 322            | 5                 | 155.69               | 137.89               | 27.60                   |
| 10                | 210            | 3                 | 84.51                | 71.17                | 13.34                   |
| 11                | 220            | 3                 | 88.96                | 84.51                | 7.70                    |
| 12                | 215            | 1                 | 80.07                | na                   | na                      |
| 13                | 260            | 3                 | 142.34               | 136.42               | 6.79                    |
| 14                | 245            | 2                 | 71.17                | 60.05                | 15.74                   |
| 15                | 240            | 4                 | 97.86                | 90.08                | 6.67                    |

**SI Table 2. Maximum anterior bite forces (ABF) and bite force quotients (BFQ) for apex predatory fishes.**

| Species Name                                  | Body Mass (Kg) | Max ABF (N) | Residuals    | BFQ           |
|-----------------------------------------------|----------------|-------------|--------------|---------------|
| Living Taxa:                                  |                |             |              |               |
| <i>Sphyrna barracuda</i> <sup>3,33</sup>      | 11.9           | 93          | -0.578       | 26.45         |
| <i>Carcharhinus limbatus</i> <sup>20,34</sup> | 22.1           | 423         | -0.077       | 83.71         |
| <b><i>Serrasalmus rhombeus</i></b>            | <b>0.2</b>     | <b>85</b>   | <b>0.399</b> | <b>250.80</b> |
| <b><i>Serrasalmus rhombeus</i></b>            | <b>1.1</b>     | <b>320</b>  | <b>0.561</b> | <b>363.69</b> |
| <i>Carcharhinus leucus</i> <sup>34</sup>      | 140.3          | 1023        | -0.164       | 68.49         |
| <i>Sphyrna mokarra</i> <sup>34</sup>          | 580.6          | 2432        | -0.150       | 70.83         |
| <i>Carcharodon carcharias</i> <sup>5</sup>    | 240.0          | 1602        | -0.106       | 78.31         |
| <i>Carcharodon carcharias</i> <sup>5</sup>    | 3324.0         | 9320        | -0.011       | 97.60         |
| Extinct Taxa:                                 |                |             |              |               |
| <i>Carcharodon megalodon</i> <sup>5</sup>     | 47690.0        | 55522       | 0.086        | 122.01        |
| <i>Carcharodon megalodon</i> <sup>5</sup>     | 103197.0       | 93127       | 0.115        | 130.17        |
| <i>Dunkleosteus terrelli</i> <sup>2</sup>     | 1000.0         | 6170        | 0.116        | 130.65        |
| <b><i>Megapiranha paranensis</i></b>          | <b>10.6</b>    | <b>1240</b> | <b>0.576</b> | <b>376.91</b> |
| <b><i>Megapiranha paranensis</i></b>          | <b>73.5</b>    | <b>4749</b> | <b>0.667</b> | <b>464.44</b> |

33. Habegger, M.L., Motta, P.J., Huber, D.R., Deban, S.M. Feeding biomechanics in the great barracuda during ontogeny. *J. Zool.* 1: 1-10 (2010).
34. Huber, D.R., Claes, J.M., Mallefet, J., Herrel, A. Is extreme bite performance associated with extreme morphologies in sharks. *Physio. & Biochem. Zool.* 82(1): 20-28 (2009).
